# Supplementary material for: Ultrafast branching in intersystem crossing dynamics revealed by coherent vibrational wavepacket motions in a bimetallic Pt(ii) complex
Source: Royal Society of Chemistry journal article supplement (doi:10.1039/d2fd00009a), 2022-01-01
Supplement: d2fd00009a1.pdf [file d2fd00009a1.pdf]

## Supporting Information

# **Ultrafast Branching in Intersystem Crossing Dynamics Revealed by Coherent Vibrational Wavepacket Motions in a Bimetallic Pt(II) Complex**

Pyosang Kim,<sup>\*,1,2</sup> Andrew J. S. Valentine,<sup>3</sup> Subhangi Roy,<sup>4</sup> Alexis W. Mills,<sup>3</sup> Felix N. Castellano,<sup>\*,4</sup> Xiaosong Li,<sup>\*,3</sup> and Lin X. Chen<sup>\*,1,2</sup>

<sup>1</sup>Department of Chemistry, Northwestern University, Evanston, Illinois 60208, United States

<sup>2</sup>Chemical Science and Engineering Division, Argonne National Laboratory, Lemont, Illinois 60349, United States

<sup>3</sup>Department of Chemistry, University of Washington, Seattle, Washington 98195, United States

<sup>4</sup>Department of Chemistry, North Carolina State University, Raleigh, North Carolina 27695-8204, United States

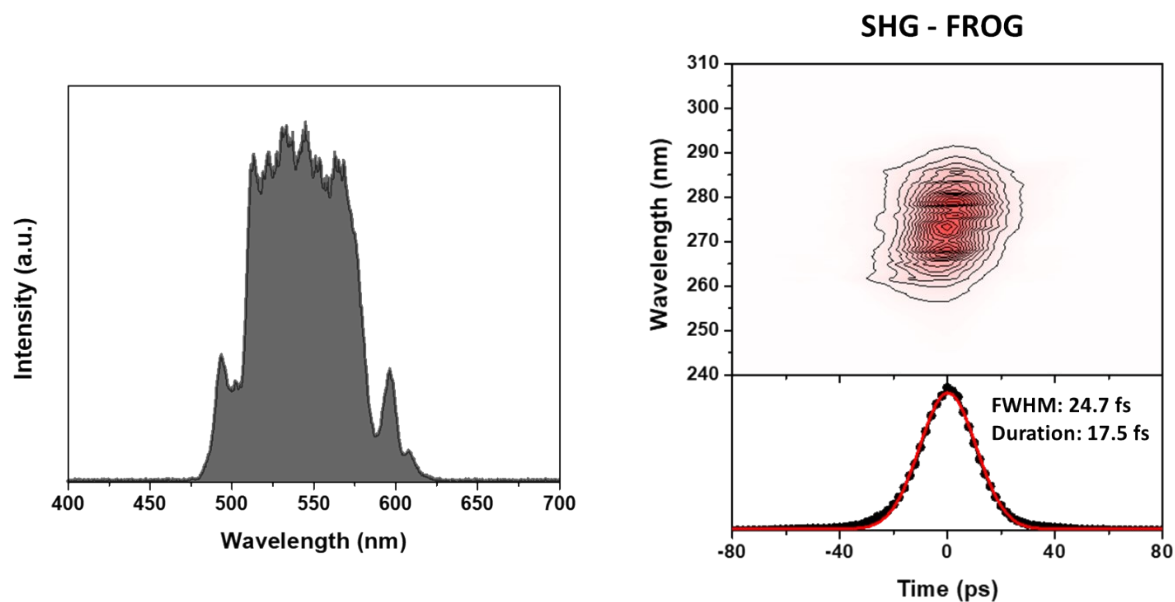

**Figure S1.** (Right) Pump laser pulse used for fs-BBTA measurements, and (left) the spectral and temporal profiles of the pump laser pulse obtained by the second-harmonic generation frequency-resolved optical gating (SHG-FROG). The pulse duration of 17.5 fs was characterized by fitting to a Gaussian function (red line) with 24.7 fs FWHM.
